# Supplementary material for: Interaction of HLA-DRB1*03 and smoking for the development of anti-Jo-1 antibodies in adult idiopathic inflammatory myopathies: a European-wide case study
Source: PubMed Central journal article supplement — Ann Rheum Dis. 2011 Dec 20;71(6):961–5. doi: 10.1136/annrheumdis-2011-200182 (PMC3371226; doi:10.1136/annrheumdis-2011-200182), 2011-12-20
Supplement: ard-71-6-0961-s1.pdf [file ard-71-6-0961-s1.pdf]

**Table S1: Summary of HLA frequencies, by country**

|         | Hungary | Czech | Sweden | UK   | Total |
|---------|---------|-------|--------|------|-------|
| DRB1*01 | 15.5    | 17.5  | 22.3   | 22.2 | 24.1  |
| DRB1*02 | 32.6    | 28.4  | 20.2   | 17.2 | 34.4  |
| DRB1*03 | 32.0    | 43.2  | 54.3   | 52.5 | 56.2  |
| DRB1*04 | 26.0    | 18.0  | 31.9   | 32.3 | 33.3  |
| DRB1*07 | 16.6    | 21.3  | 8.5    | 21.2 | 23.0  |
| DRB1*08 | 5.5     | 6.0   | 8.5    | 0.0  | 6.8   |
| DRB1*09 | 2.2     | 1.1   | 2.1    | 2.0  | 2.3   |
| DRB1*10 | 1.1     | 1.6   | 2.1    | 0.0  | 1.6   |
| DRB1*11 | 29.8    | 20.8  | 8.5    | 10.1 | 25.8  |
| DRB1*12 | 2.2     | 1.6   | 0.0    | 3.0  | 2.3   |
| DRB1*13 | 17.1    | 21.3  | 23.4   | 15.2 | 25.1  |
| DRB1*14 | 5.0     | 7.7   | 5.3    | 5.1  | 7.7   |
